# Supplementary figures and images for: Integrated Metabolomic and Transcriptomic Analysis Reveals the Flavonoid Regulatory Network by Eutrema EsMYB90
Source: MDPI journal article supplement (doi:10.3390/ijms22168751), 2021-08-15

**A**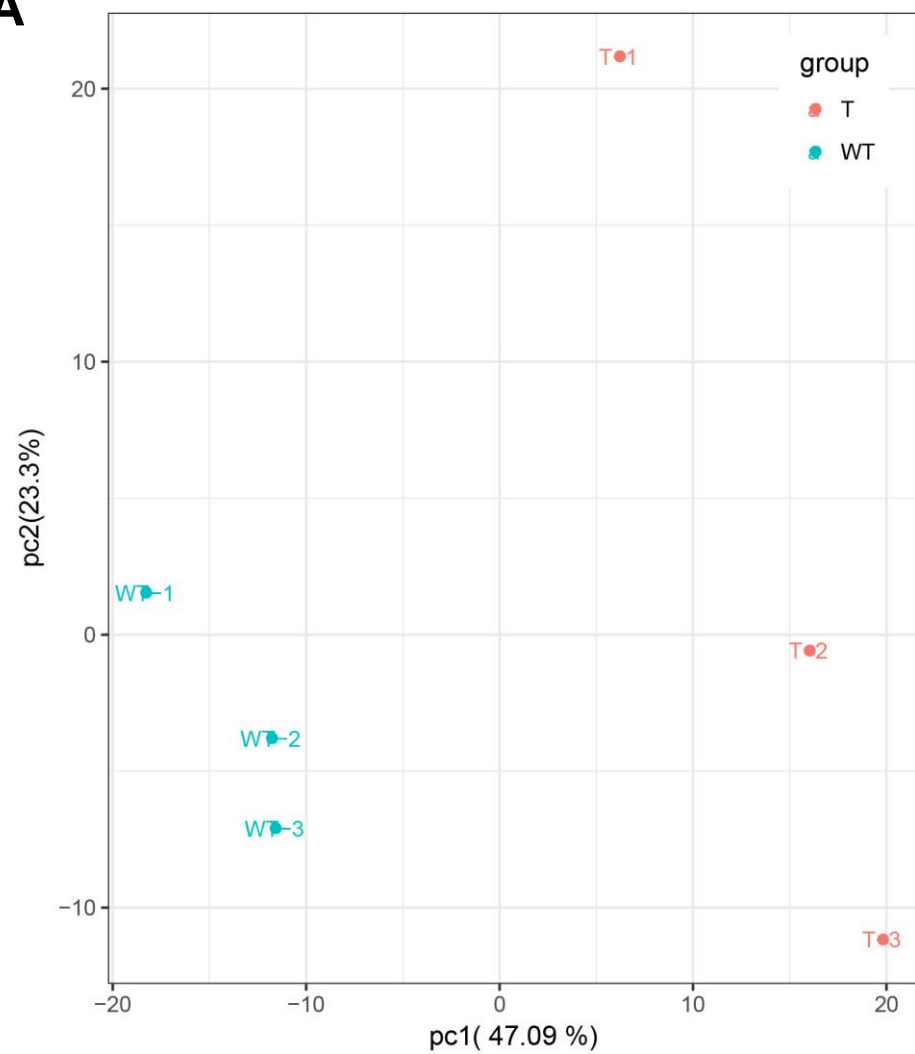**B**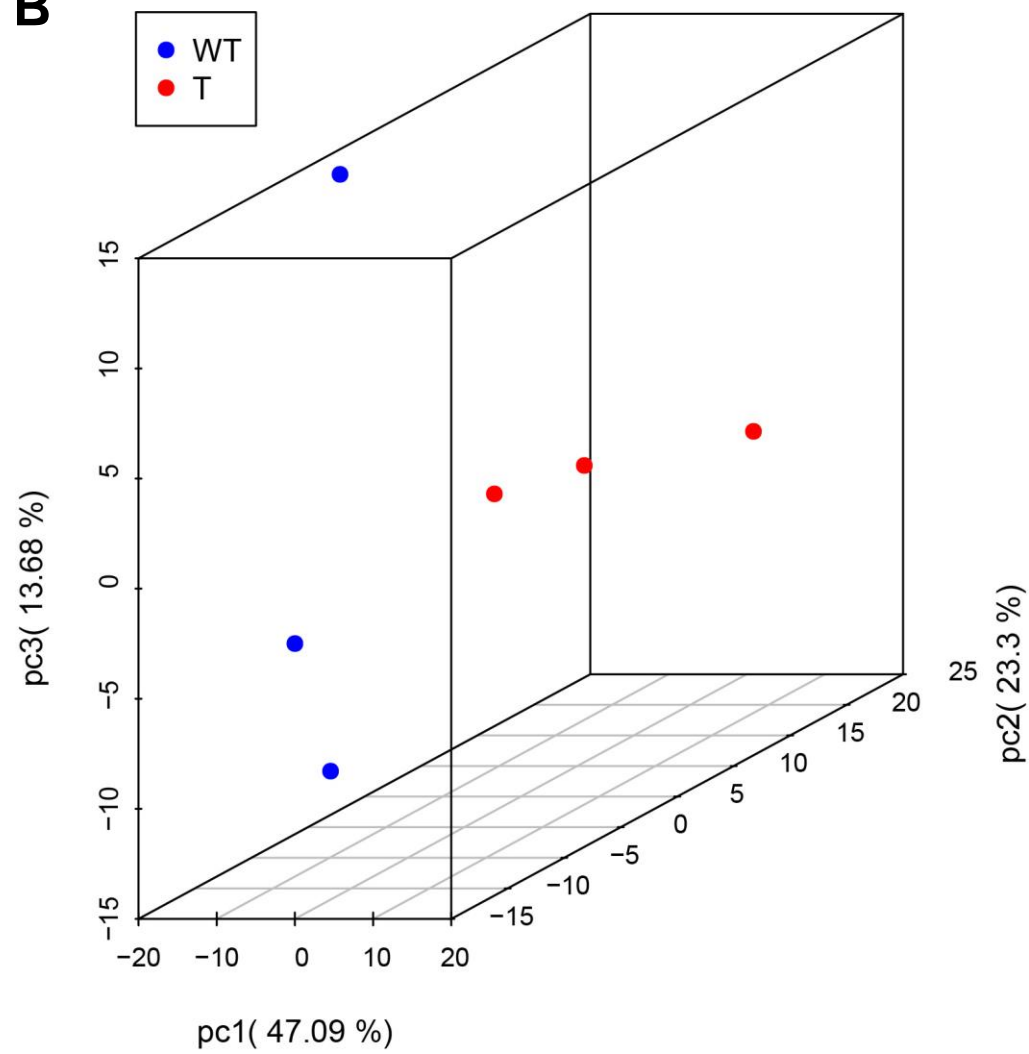

Supplement: s1 [file s1]

**A**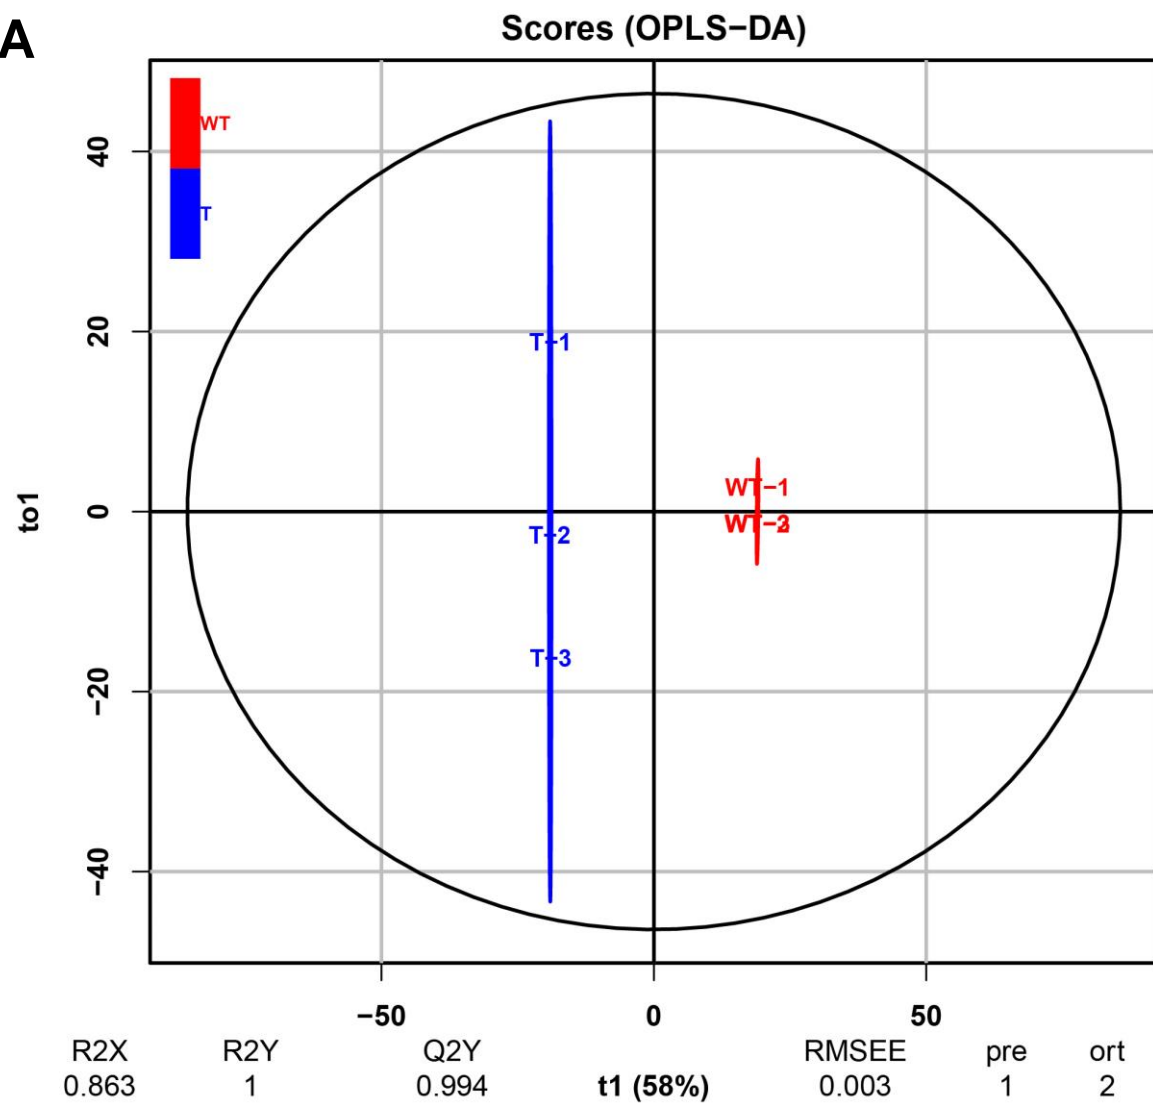**B**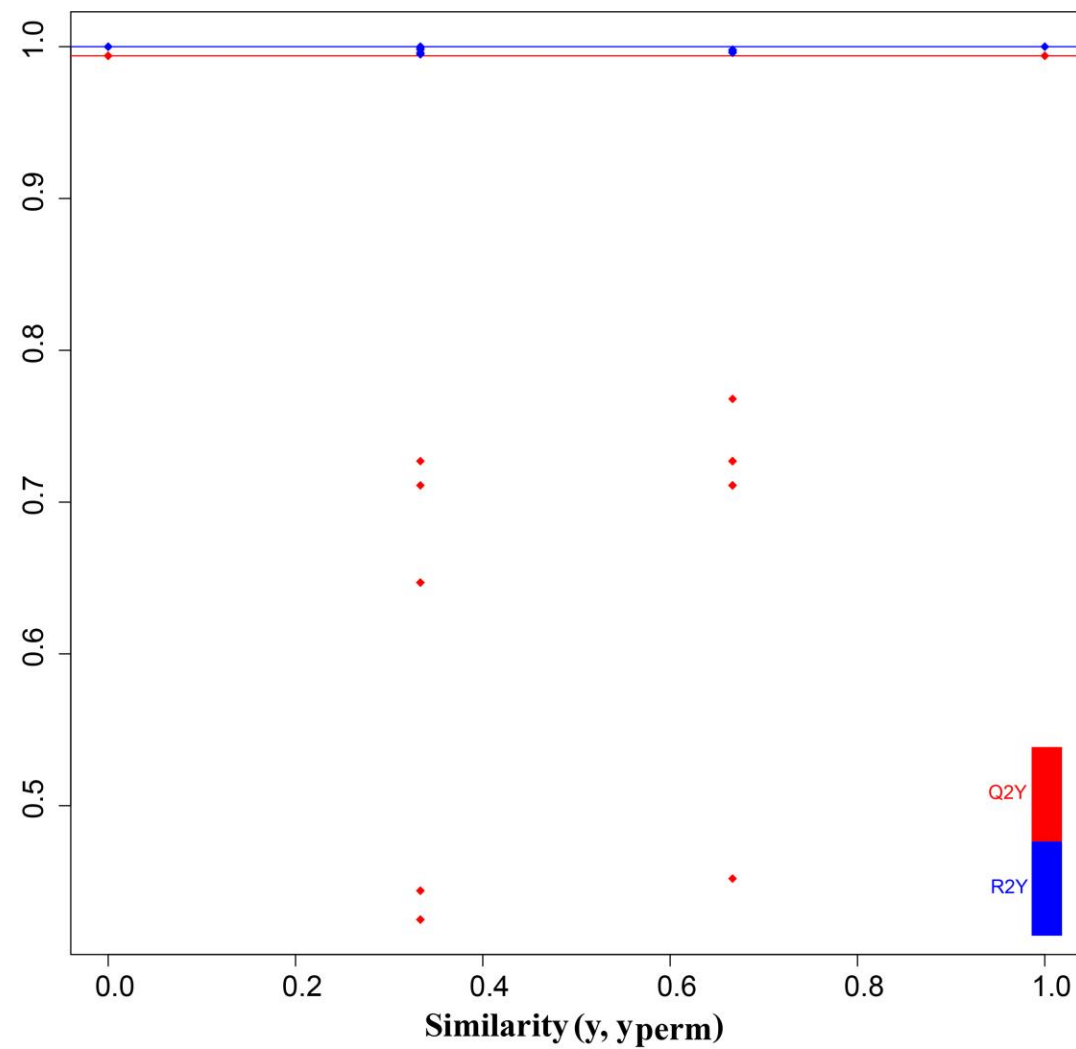

Supplement: s1 [file s1]
